# Supplementary material
Source: PubMed Central journal article supplement (PMC2664534)
Supplement: NIHMS89586-supplement-suppl_1.pdf [file NIHMS89586-supplement-suppl_1.pdf]

## Supplemental Information

### **Genome-wide interrogation of germline genetic variation associated with treatment response in childhood acute lymphoblastic leukemia**

Jun Yang<sup>1</sup> PhD, Cheng Cheng<sup>1</sup> PhD, Wenjian Yang<sup>1</sup> PhD, Deqing Pei<sup>1</sup> MS, Xueyuan Cao<sup>1</sup> MS, Yiping Fan<sup>1</sup> PhD, Stan Pounds<sup>1</sup> PhD, Lisa R. Treviño<sup>1</sup> PhD, Deborah French<sup>1</sup> PhD, Dario Campana<sup>1</sup> MD, PhD, James R. Downing<sup>1</sup> MD, William E. Evans<sup>1</sup> Pharm D, Ching-Hon Pui<sup>1</sup> MD, Meenakshi Devidas<sup>2</sup> PhD, W.P. Bowman<sup>3</sup> MD, Bruce M. Camitta<sup>4</sup> MD, Cheryl Willman<sup>5</sup> MD, Stella M. Davies<sup>6</sup> MBBS, PhD, Michael J. Borowitz<sup>7</sup> MD, PhD, William L. Carroll<sup>8</sup> MD, Stephen P. Hunger<sup>9</sup> MD, Mary V. Relling<sup>1</sup> Pharm D

<sup>1</sup>St. Jude Children's Research Hosp., Memphis, TN

<sup>2</sup>University of Florida, Gainesville, FL

<sup>3</sup>Cook Children's Medical Center, Ft. Worth, TX

<sup>4</sup>Medical College of Wisconsin, Milwaukee, WI

<sup>5</sup>University of New Mexico Cancer Center, Albuquerque, NM

<sup>6</sup>Cincinnati Children's Hospital and Medical Center, Cincinnati, OH

<sup>7</sup>Johns Hopkins Medical Institute, Baltimore, MD

<sup>8</sup>New York University Medical Center, NY, NY

<sup>9</sup>The Children's Hospital and the University of Colorado Cancer Center, Aurora, CO

## **Supplemental Methods**

**Genotyping calls and imputation:** Genotypes were assigned using the BRLMM calling algorithm<sup>1</sup> and coded as 0, 10, or 20 based on the number of B alleles. In total, there was an average of ~9,500 SNPs per patient not called by BRLMM. Missing genotypes were imputed using linkage disequilibrium (LD) between missing and typed SNPs in the appropriate race/ancestry groups for each patient, with LD patterns established using the HapMap data sets release 22, when LD was informative (median of ~3,500 SNPs per patient). However, if the imputed genotype was discordant with the direction of the raw intensity signals (e.g. if raw data indicated AA or AB but not BB, but LD patterns indicated BB), then the genotype was not imputed and left as missing (median of < 400 SNPs per patient). Alternatively, if LD information was unavailable for a SNP with missing genotype, an intermediate value (between 0 to 10 or 10 to 20) was assigned based on the actual signal intensity distribution observed from the chip (median of ~6,000 SNPs per patient).

**Quality control (SNP and patient exclusion):** Patient-specific quality control included accuracy of sex assignment, ruling out duplication of samples, lack of conflict for self-declared vs. genotype-based race/ancestry, and lack of DNA degradation by agarose gel electrophoresis. Also, a minimum of 95% of SNPs (markers interrogated by the Nsp and Sty 250K arrays) with successful genotyping call using the BRLMM software was required, and an acceptable proportion of heterozygote calls (within three standard deviations of the average proportion of heterozygote calls). Of 371 St. Jude patients with germline DNA and end-of-induction MRD, 25 failed to achieve 95% call rates and were

therefore removed from the cohort. Likewise, 20 of 227 COG patients with germline DNA and MRD status had call rates <95%, and were excluded.

To minimize confounding effects by subtype, patients with *BCR-ABL*, *E2A-PBX1*, and *MLL*-rearranged subtypes of ALL (n=28 in St. Jude and 38 in COG) were also excluded from the subsequent genome-wide association analyses. These 3 ALL molecular subtypes were significantly associated ( $P<0.05$ ) with end-of-induction MRD and differed in frequency between the St. Jude and COG cohorts, as indicated by Chi-square tests (Supplemental Table 1S). Therefore, the final population for the genome-wide association analyses of SNPs vs. MRD consisted of 318 St. Jude patients and 169 COG patients.

SNP-specific quality control included removing SNPs with minor allele frequency (MAF) <1%, and/or call rate<95%. In total, 35,965 SNPs were removed due to rarity, and 73,828 were removed because of poor genotyping quality. Deviations from Hardy Weinberg equilibrium were assessed using a Chi-square test for each race/ancestry group; P values were assigned to each SNP but not used to exclude consideration of genotyping data. In total, 476,796 SNPs were included in the final genome wide association analyses. For each top ranked SNP, raw signal intensity plots (A vs B allele signal intensity) for the patients were analyzed for any deviations from the expected trimodal clustering of AA, AB, and BB genotypes; all 102 top ranked overlapping SNPs gave high quality cluster plots.

**SNP annotation:** A SNP was annotated to a gene if it was located in the gene, within 5 Kb upstream/downstream of the gene, or in linkage disequilibrium with SNPs that met the above criteria.

**Race:** Race was inferred based on hierarchical clustering by including genotypes from patients with those available from the HapMap resource (n=90 CEU (Europeans), 90 YRI (Africans), 30 CHB (Chinese), and 30 JPT (Japanese)), using all SNPs on the SNP array with 100% call rates. Good agreement was observed between self-declared race of patients and that determined by germline SNP genotypes: 99% and 93% accuracy of self-declared race in the St. Jude and COG cohorts, respectively.

**Permutation-asymptotic hybrid P values for association with MRD:** The end-of-induction MRD phenotype was regarded as an ordinal variable with 1, 2, and 3 coding for negative, positive, and high-positive (defined in the Methods), respectively. The genotype of each SNP was coded based on the number of B alleles in the genotype call (see above). For a given SNP, association between its genotype and the phenotype was measured by the rank (Spearman's) correlation coefficient, where average ranks were used for ties. More specifically, let  $R_1, \dots, R_n$  denote the average ranks of the observed phenotype values, and let  $S_1, \dots, S_n$  denote the average ranks of the observed genotype values. Then the rank correlation  $C_R$  is defined as the sample correlation of the average ranks:

$$C_R = \frac{n^{-1} \sum_{i=1}^n (R_i - \bar{R})(S_i - \bar{S})}{\sqrt{(n-1)^{-1} \sum_{i=1}^n (R_i - \bar{R})^2} \sqrt{(n-1)^{-1} \sum_{i=1}^n (S_i - \bar{S})^2}}. \quad (1)$$

Because  $C_R$  is essentially in a form of a sample average, the Central Limit Theorem implies that, under the null hypothesis of no association between the SNP genotype and the phenotype,  $C_R$  asymptotically (as the sample size  $n \rightarrow \infty$ ) follows a normal distribution with mean zero and some variance  $\sigma^2$ . We estimated this variance by 4,000 permutations. In each permutation round the first component in the  $n$  pairs  $(R_i, S_i)$ ,  $i=1, \dots, n$  were randomly permuted and  $C_R$  was recalculated. The sample variance of the 4,000  $C_R$  values computed from the permuted data was used to estimate  $\sigma^2$ . The two-sided permutation-asymptotic P value was calculated as

$$P = 2 \left( 1 - \Phi \left( \frac{|C_R|}{\hat{\sigma}} \right) \right) \quad (2)$$

where  $\hat{\sigma}^2$  is the permutation estimate of  $\sigma^2$ , and  $\Phi$  denotes the cumulative distribution function of the standard normal (i.e.,  $N(0,1)$ ) distribution.

Note that the above description is for a single SNP. The asymptotic variance of  $C_R$  under the null hypothesis was estimated for each SNP, and different SNPs usually have different estimates for the asymptotic variance of  $C_R$  under the null hypothesis.

By computing P values this way we overcame the granularity of purely permutation-based P values and substantially reduced the computing demand in the internal validation inference described below.

**False discovery rate (FDR) estimation and internal validation:** Using the estimator we developed,<sup>2</sup> we estimated the FDR at the P value cutoff (per-test significance level)  $\gamma$  = 0.0005, 0.00075, 0.001, 0.0025, 0.005, 0.0075, 0.01, 0.0125, 0.015, 0.0175, 0.02 (Fig.

2S). For example, there were 8,635 SNPs with  $P \leq 0.0125$  in the St. Jude cohort, with the FDR level 67.2%; there were 7,881 SNPs with  $P \leq 0.0125$  on the COG cohort, with the FDR level 73.4%. Hence at the 0.0125 per-test significance level we roughly expected to capture on the St. Jude (COG) cohort 2,832 (2096) SNPs that are truly associated with the phenotype and make 5803 (5,785) false discoveries. The remaining issue then was: if in fact none of SNPs was associated with the phenotype, for a given per-test significance level, how often we could observe the evidence for SNP-phenotype association that is at least as strong as that expected by chance. To resolve this issue we performed an internal validation inference on each cohort as follows. In one cohort, the P value of each SNP carried the weight of evidence for that SNP's association with the phenotype; thus for a given P value cutoff  $\gamma$ , the aggregate weight of evidence in the SNPs with  $P \leq \gamma$  can be described by the score statistic

$$S(\gamma) = -\sum_{j=1}^m I(P_j \leq \gamma) \log(P_j),$$

where  $m$  is the total number of SNPs and  $I$  denotes the indicator function, i.e.,  $I(A)=1$  if the statement  $A$  is true and  $I(A)=0$  otherwise. The validation inference then consisted of a permutation test based on this statistic. In each permutation round, the ranks of the phenotype values were randomly permuted, the rank correlation  $C_R$  was recalculated for each SNP using the permuted data, and the P value was recalculated according to Equation (2); then the score statistic  $S(\gamma)$  was recalculated. The *profile significance* of the set of SNPs with  $P \leq \gamma$  was then defined as

$$PS(\gamma) = \frac{1}{N} \sum_{j=1}^N I(S_j(\gamma) \geq S(\gamma)),$$

where  $N$  is the number of permutation rounds,  $S_j(\gamma)$  is the recalculated score statistic in the  $j$ th permutation round, and  $S(\gamma)$  is the score statistic calculated on the unpermuted (original) data. Profile significance for the above sequence of per-test significance levels was produced in each cohort (Fig. 2S). The profile significance at  $\gamma = 0.0125$  was 0.0650 (0.0545) on the St. Jude (COG) cohort, based on 2,000 permutations.

As the P value cutoff  $\gamma$  increases, the estimated FDR steadily increases, whereas the profile significance did not vary much (Fig. 2S). Considering the number of SNPs captured, the level of FDR, the expected number of false positives, the expected number of true positives, and the profile significance, we chose 0.0125 for the P value cutoff to determine a specific set of SNPs on each cohort for further investigation.

**Bi-directional validation:** We sought to address whether the evidence for genotype-phenotype associations among the SNPs captured by  $P \leq 0.0125$  could be “validated” in some way externally, i.e., independent of the cohort in which they were discovered.

Toward this end, we used the COG cohort to validate the evidence of genotype-phenotype association contained in the SNPs discovered in the St. Jude cohort, and vice versa.

Simon<sup>3</sup> pointed out that in the context of classifier validation, it is inappropriate to insist that each gene expression feature achieves the same or higher observed significance level (P value) on the validation set, because the observed P values of each feature can be unstable from one dataset to another; it is the classifier as a whole that should be

validated. The same principle may be applied to genomic association studies. One should not insist that each SNP reaches the same or higher statistical significance on the validation set, rather it is the total evidence for genotype-phenotype association contained in the set of captured SNPs that should be validated. For this purpose we developed a rank test procedure as follows.

A SNP was considered concordant on the St. Jude and COG cohorts if its genotype-phenotype association had the same direction on both cohorts. Let  $D_{SJ}$  denote the sign function of the rank correlation between the genotype and MRD levels on the St. Jude cohort ( $D_{SJ} = -1, 0, 1$  for negative, zero, and positive rank correlation respectively); likewise define  $D_{COG}$ . Then a SNP was concordant if and only if  $D_{SJ} D_{COG} > 0$ . The rank test procedure to validate the St. Jude SNPs on the COG cohort consists of the following steps.

- (1) Sort the SNPs according to their P value in increasing order on the COG cohort.
- (2) Suppose there are  $M$  St. Jude SNPs to validate ( $M=8,635$  in this case). Let  $R_1, \dots, R_M$  be their ranks on the rank order obtained in (1). Define the “unitized” ranks as  $W_i = R_i/m, i=1, \dots, M$ , where  $m$  is the total number of SNPs ( $m=476,796$ ).
- (3) If none of the SNPs is associated in the COG cohort and the SNP-phenotype associations are observed purely by chance, then given  $M$ , the ranks obtained in (2) are approximately a simple random sample out of the set  $\{1, 2, \dots, m\}$ ; with  $m$  being large, the unitized ranks ( $W$ 's) form approximately a random sample from the *Uniform*(0,1) distribution; furthermore, for each of these SNPs, the probability



of concordance (i.e.,  $D_{SJ} D_{COG} > 0$ ) is 0.5; this provides the null model. The SNP-phenotype association among these SNPs on the validation set (the COG cohort) can then be measured by the statistic

$$T = -\sum_{i=1}^M I(D_{SJ,i} D_{COG,i} > 0) \log(W_i).$$

The higher the concordant SNPs are ranked (the smaller are their rank numbers), the larger is  $T$ . Under the null model,  $T$  has the cumulative distribution function

$$\text{(cdf)} \quad F(t) = 0.5^M I(t \geq 0) + \sum_{j=1}^M B(j; M, 0.5) G(t; j, 1), \quad -\infty \leq t \leq \infty, \quad \text{where } B(\cdot; M, 0.5)$$

is the *Binomial*( $M, 0.5$ ) cdf and  $G(\cdot; j, 1)$  is the *Gamma*( $j, 1$ ) cdf. Thus the statistical significance (P value) of the validation inference is  $P = 1 - F(T)$ .

The COG SNPs were validated in the St. Jude cohort likewise, with the roles of St. Jude (COG) SNPs and St. Jude (COG) cohorts interchanged.

The validation P value of the St. Jude SNPs on the COG cohort was  $2.2046 \times 10^{-6}$ , and the validation P value of the COG SNPs on the St. Jude cohort reached a higher statistical significance of  $P < 10^{-11}$ .

**Combined P value:** To account for an assessment of significance of a SNP in both cohorts, we estimated a “combined” P value for each SNP. For a SNP, we let  $P_{SJ}$  and  $P_{COG}$  be the permutation-asymptotic hybrid P value as described above for the St. Jude

and COG cohorts, respectively. Then a statistic combining evidence for the SNP-phenotype association on both cohorts is

$$S = -I(D_{SJ}D_{COG} > 0)[\log(P_{SJ}) + \log(P_{COG})].$$

The two P values are independent, and under the null hypothesis that the SNP is not associated with the phenotype in either cohort, the two P values follow approximately the *Uniform(0,1)* distribution and the probability of concordance is 0.5; thus  $S$  has the following cdf under the null hypothesis:  $F_S(x) = 0.5I(x \geq 0) + 0.5G(x;2,1), -\infty < x < \infty$ , where  $G$  is the Gamma(2,1) cdf. Then the combined P value for the SNP was calculated as  $P = 1 - F_S(S)$ .

***IL15* gene expression:** Expression of *IL15* (probe set 205992\_s\_at) in the diagnostic leukemia blasts was assessed by Affymetrix U133A microarray in a subset of St. Jude and COG MRD cohorts (n=194 in St. Jude and 148 in COG), as described.<sup>4</sup> Gene expression values were generated and normalized within the St. Jude and COG cohorts, using MAS5.0 software. Association with MRD was analyzed using linear regression. Relationship between *IL15* SNP (rs17007695) genotype (CC vs. TC/TT) and *IL15* gene expression was assessed in the combined St. Jude and COG cohort using a t-test.

## Supplemental Reference List

- (1) Rabbee N, Speed TP. A genotype calling algorithm for affymetrix SNP arrays. *Bioinformatics* 2006 January 1;22(1):7-12.
- (2) Cheng C, Pounds SB, Boyett JM, Pei D, Kuo ML, Roussel MF. Statistical significance threshold criteria for analysis of microarray gene expression data. *Stat Appl Genet Mol Biol* 2004;3:Article36.
- (3) Simon R. Roadmap for developing and validating therapeutically relevant genomic classifiers. *J Clin Oncol* 2005 October 10;23(29):7332-41.
- (4) Flotho C, Coustan-Smith E, Pei D et al. Genes contributing to minimal residual disease in childhood acute lymphoblastic leukemia: prognostic significance of CASP8AP2. *Blood* 2006 August 1;108(3):1050-7.

**Table 1S. Patient characteristics and relation to minimal residual disease (MRD).**

|                             |                            | St. Jude              |                              | COG**                 |                              |
|-----------------------------|----------------------------|-----------------------|------------------------------|-----------------------|------------------------------|
|                             |                            | Patients (%)<br>n=371 | Relation to MRD<br>(P value) | Patients (%)<br>n=227 | Relation to MRD<br>(P value) |
| <b>Race</b>                 | Caucasian                  | 282 (76%)             | 0.5187                       | 132 (58%)             | 0.1862                       |
|                             | African                    | 58 (16%)              |                              | 12 (5%)               |                              |
|                             | Other                      | 21 (8%)               |                              | 63 (37%)              |                              |
| <b>Gender</b>               | Male                       | 213 (57%)             | 0.2481                       | 154 (68%)             | 0.2793                       |
|                             | Female                     | 158 (43%)             |                              | 73 (32%)              |                              |
| <b>Age at Diagnosis</b>     | <1 year                    | 6 (1%)                | 0.0849                       | 0                     | 0.0439*                      |
|                             | 1-10 years                 | 262 (71%)             |                              | 73 (32%)              |                              |
|                             | >10 years                  | 103 (28%)             |                              | 154 (68%)             |                              |
| <b>WBC at Diagnosis</b>     | <50k cells/mm <sup>3</sup> | 269 (73%)             | 0.03682*                     | 124 (55%)             | 0.1889                       |
|                             | >50k cells/mm <sup>3</sup> | 102 (27%)             |                              | 103 (45%)             |                              |
| <b>Lineage</b>              | B-lineage                  | 299 (81%)             | 0.4467                       | 227 (100%)            | NA                           |
|                             | T-cell                     | 72 (19%)              |                              | 0 (0%)                |                              |
| <b>Molecular Subtype</b>    | TEL-AML1                   | 65 (17%)              | 0.1251                       | 3 (1%)                | 0.3769                       |
|                             | BCR-ABL                    | 12 (3%)               | <0.0001*                     | 0                     | NA                           |
|                             | E2A-PBX1                   | 13 (3%)               | 0.7338                       | 23 (10%)              | 0.0012*                      |
|                             | MLL rearrangements         | 7 (2%)                | 0.241                        | 18 (8%)               | 0.0027*                      |
|                             | No common translocations   | 274 (74%)             | NA                           | 183 (81%)             | NA                           |
| <b>End-of-induction MRD</b> | <0.01%                     | 293 (79%)             | NA                           | 149 (66%)             | NA                           |
|                             | 0.01---1%                  | 63 (17%)              |                              | 52 (23%)              |                              |
|                             | >1%                        | 15 (4%)               |                              | 26 (11%)              |                              |

WBC: white blood cell count; MRD: minimal residual disease; NA: non-applicable.

Association between MRD (categorical variables, as defined in the Methods) and patient characteristics was assessed by using a Chi-square test.

\*Older age(>10 years), high WBC (>50k cells/mm<sup>3</sup>), presence of BCR-ABL, MLL rearrangements or absence of E2A-PBX1 were associated with MRD positivity.

\*\*While St. Jude trials included all newly-diagnosed ALL patients, the COG P9906 study was intended for children with high risk B-precursor ALL.

**Table 2S. Association of the 102 overlapping SNPs with end-of-induction MRD..**

| SNP           | Chr | Location  | RS_ID      | Gene  | MAF  | Risk Allele | P_SJ     | P_COG   | P_Comb   | P_Adjusted | OR                   |
|---------------|-----|-----------|------------|-------|------|-------------|----------|---------|----------|------------|----------------------|
| SNP_A-1709241 | 7   | 8970101   | rs10486275 |       | 0.32 | T           | 0.0041   | 0.00931 | 2.13E-04 | 3.08E-04   | 2.05 (1.25, 3.36)    |
| SNP_A-4291612 | 14  | 48095268  | rs4522336  |       | 0.16 | C           | 0.00622  | 0.0105  | 3.47E-04 | 5.87E-03   | 2.22 (1.12, 4.39)    |
| SNP_A-2155892 | 13  | 100595841 | rs7992226  | NALCN | 0.25 | A           | 0.00448  | 0.00485 | 1.28E-04 | 2.38E-05   | 2.05 (1.2, 3.51)     |
| SNP_A-2292283 | 2   | 100961907 | rs1542178  | NPAS2 | 0.28 | G           | 0.00137  | 0.0115  | 9.50E-05 | 1.18E-04   | 0.464 (0.276, 0.779) |
| SNP_A-2239298 | 8   | 18673653  | rs11203995 | PSD3  | 0.49 | C           | 0.00887  | 0.00932 | 4.30E-04 | 5.99E-04   | 1.68 (1.13, 2.49)    |
| SNP_A-4236270 | 3   | 170154427 | rs9871556  |       | 0.45 | C           | 6.87E-04 | 0.00335 | 1.61E-05 | 7.91E-06   | 1.95 (1.3, 2.93)     |
| SNP_A-2191667 | 1   | 215239015 | rs1339219  | ESRRG | 0.45 | C           | 0.00868  | 0.00589 | 2.78E-04 | 4.60E-04   | 0.576 (0.384, 0.865) |
| SNP_A-1740495 | 3   | 7887606   | rs7652838  |       | 0.12 | G           | 0.0114   | 0.00598 | 3.61E-04 | 2.79E-04   | 2.88 (1.2, 6.89)     |
| SNP_A-1673416 | 6   | 55918441  | rs4312989  |       | 0.34 | C           | 0.00557  | 0.00819 | 2.51E-04 | 5.38E-04   | 0.503 (0.305, 0.827) |
| SNP_A-2297092 | 1   | 43493581  | rs3862227  |       | 0.32 | G           | 7.88E-04 | 0.0111  | 5.53E-05 | 1.22E-04   | 1.86 (1.24, 2.79)    |
| SNP_A-2240822 | 19  | 39306923  | rs11673011 |       | 0.31 | G           | 0.00777  | 0.00613 | 2.61E-04 | 8.70E-04   | 1.92 (1.18, 3.11)    |
| SNP_A-2277218 | 19  | 39303589  | rs11666638 |       | 0.31 | G           | 0.00531  | 0.00851 | 2.49E-04 | 8.73E-04   | 0.508 (0.312, 0.828) |
| SNP_A-4264692 | 5   | 3469372   | rs17683231 |       | 0.07 | A           | 0.0115   | 0.00179 | 1.21E-04 | 1.03E-04   | 0.419 (0.226, 0.777) |
| SNP_A-1980351 | 5   | 3448915   | rs17682547 |       | 0.05 | C           | 0.0024   | 0.0077  | 1.10E-04 | 3.39E-05   | 2.77 (1.4, 5.47)     |
| SNP_A-2216221 | 5   | 3470577   | rs17632091 |       | 0.05 | A           | 0.00557  | 0.00363 | 1.19E-04 | 3.04E-05   | 3.2 (1.43, 7.13)     |
| SNP_A-2172039 | 4   | 33719815  | rs13106616 |       | 0.15 | A           | 0.00598  | 0.00128 | 4.89E-05 | 1.70E-04   | 2.01 (1.27, 3.18)    |
| SNP_A-1976736 | 4   | 33700472  | rs12644671 |       | 0.16 | G           | 0.00474  | 0.00403 | 1.13E-04 | 3.14E-04   | 1.94 (1.25, 2.99)    |
| SNP_A-2009694 | 4   | 33405626  | rs6844110  |       | 0.16 | G           | 0.00224  | 0.00692 | 9.36E-05 | 1.12E-04   | 2.22 (1.39, 3.54)    |
| SNP_A-1930229 | 4   | 33424921  | rs1373494  |       | 0.15 | C           | 0.00394  | 0.0113  | 2.45E-04 | 9.20E-05   | 2.19 (1.38, 3.47)    |
| SNP_A-1907313 | 4   | 33406171  | rs7691996  |       | 0.15 | G           | 0.0037   | 0.00692 | 1.48E-04 | 2.29E-04   | 0.462 (0.289, 0.739) |
| SNP_A-2009695 | 4   | 33406328  | rs7664751  |       | 0.15 | A           | 0.00447  | 0.00692 | 1.76E-04 | 2.69E-04   | 2.14 (1.34, 3.41)    |
| SNP_A-4194613 | 10  | 126638997 | rs17152408 | CTBP2 | 0.16 | A           | 0.00512  | 0.00842 | 2.38E-04 | 1.10E-04   | 2.3 (1.33, 3.96)     |
| SNP_A-1913543 | 10  | 126639506 | rs17152411 | CTBP2 | 0.15 | G           | 0.0078   | 0.00766 | 3.20E-04 | 2.43E-04   | 2.05 (1.2, 3.51)     |
| SNP_A-2265775 | 10  | 126574989 | rs7900929  | CTBP2 | 0.15 | C           | 0.00495  | 0.00422 | 1.23E-04 | 2.01E-04   | 2.08 (1.22, 3.54)    |
| SNP_A-2218245 | 10  | 126577363 | rs7086128  | CTBP2 | 0.15 | G           | 0.00526  | 0.00422 | 1.30E-04 | 2.74E-04   | 2.03 (1.22, 3.4)     |
| SNP_A-1682324 | 17  | 28297991  | rs2521984  |       | 0.29 | T           | 0.00996  | 0.0117  | 5.86E-04 | 1.02E-04   | 1.92 (1.16, 3.18)    |
| SNP_A-4218391 | 1   | 176044231 | rs4650977  |       | 0.36 | G           | 0.00399  | 0.0096  | 2.14E-04 | 5.25E-04   | 0.543 (0.364, 0.81)  |
| SNP_A-1829813 | 1   | 67037519  | rs497710   | INSL5 | 0.15 | A           | 0.0081   | 0.00522 | 2.34E-04 | 1.52E-03   | 1.94 (1.16, 3.26)    |
| SNP_A-4244750 | 11  | 115818726 | rs11215936 |       | 0.06 | A           | 0.00259  | 0.00151 | 2.63E-05 | 2.18E-04   | 2.82 (1.36, 5.84)    |
| SNP_A-1853385 | 5   | 120633604 | rs17147528 |       | 0.05 | C           | 0.0109   | 0.0032  | 1.96E-04 | 4.14E-04   | 0.363 (0.167, 0.789) |
| SNP_A-4199696 | 14  | 99145812  | rs4905865  |       | 0.29 | T           | 0.00799  | 0.00586 | 2.57E-04 | 7.20E-04   | 1.63 (1.07, 2.48)    |
| SNP_A-2241347 | 14  | 99145526  | rs11160533 |       | 0.29 | C           | 0.00799  | 0.0036  | 1.65E-04 | 5.46E-04   | 0.613 (0.403, 0.933) |
| SNP_A-1786996 | 10  | 108035647 | rs1359645  |       | 0.08 | G           | 0.00229  | 0.0123  | 1.62E-04 | 1.20E-04   | 2.17 (1.24, 3.78)    |

| SNP           | Chr | Location  | RS_ID      | Gene    | MAF  | Risk Allele | P_SJ     | P_COG    | P_Comb   | P_Adjusted | OR                    |
|---------------|-----|-----------|------------|---------|------|-------------|----------|----------|----------|------------|-----------------------|
| SNP_A-2261153 | 9   | 8751778   | rs10116682 | PTPRD   | 0.04 | A           | 0.00252  | 9.24E-04 | 1.63E-05 | 2.64E-04   | 0.344 (0.161, 0.733)  |
| SNP_A-1796782 | 9   | 8739291   | rs6477346  | PTPRD   | 0.04 | G           | 0.00267  | 0.00812  | 1.27E-04 | 1.23E-03   | 2.59 (1.26, 5.34)     |
| SNP_A-1675970 | 8   | 18691618  | rs335251   | PSD3    | 0.40 | C           | 0.0113   | 0.00289  | 1.85E-04 | 1.13E-04   | 0.582 (0.386, 0.879)  |
| SNP_A-1812242 | 2   | 173455958 | rs2676527  | RAPGEF4 | 0.03 | C           | 0.0109   | 0.00826  | 4.64E-04 | 1.24E-02   | 3.03 (1.19, 7.71)     |
| SNP_A-1849963 | 22  | 47310862  | rs16999349 | FAM19A5 | 0.14 | A           | 0.00672  | 0.0107   | 3.79E-04 | 1.31E-03   | 0.478 (0.284, 0.804)  |
| SNP_A-2146428 | 14  | 47157164  | rs8004608  |         | 0.02 | A           | 0.00434  | 0.00832  | 2.03E-04 | 4.43E-04   | 0.186 (0.0597, 0.576) |
| SNP_A-2084593 | X   | 27766314  | rs16988013 |         | 0.01 | C           | 0.00211  | 0.011    | 1.35E-04 | 2.18E-04   | 0.132 (0.025, 0.695)  |
| SNP_A-1663705 | 4   | 41406619  | rs6823379  |         | 0.11 | C           | 0.01     | 0.0125   | 6.24E-04 | 5.97E-05   | 2.01 (1.2, 3.36)      |
| SNP_A-1953524 | 2   | 200752142 | rs1881539  | C2orf47 | 0.08 | G           | 0.00728  | 0.00455  | 1.87E-04 | 9.92E-03   | 2.35 (1.19, 4.63)     |
| SNP_A-1966464 | 2   | 200606142 | rs10497845 | C2orf47 | 0.08 | C           | 0.0119   | 0.00438  | 2.83E-04 | 2.95E-03   | 2.52 (1.34, 4.75)     |
| SNP_A-1807959 | 2   | 200440235 | rs769951   | C2orf47 | 0.09 | G           | 0.00579  | 4.69E-04 | 1.88E-05 | 6.19E-04   | 0.467 (0.257, 0.847)  |
| SNP_A-1794325 | 2   | 200703932 | rs4673727  | C2orf47 | 0.10 | C           | 8.39E-04 | 1.55E-04 | 1.10E-06 | 1.90E-04   | 2.85 (1.56, 5.19)     |
| SNP_A-2264953 | 2   | 200730199 | rs1569175  | C2orf47 | 0.11 | T           | 0.00116  | 9.56E-05 | 9.43E-07 | 1.69E-04   | 0.366 (0.203, 0.658)  |
| SNP_A-1717194 | 8   | 62310549  | rs1486649  |         | 0.13 | C           | 0.00222  | 0.0038   | 5.35E-05 | 1.47E-03   | 2.16 (1.28, 3.63)     |
| SNP_A-2044445 | 8   | 62315228  | rs10435604 |         | 0.13 | C           | 0.00327  | 0.00208  | 4.39E-05 | 4.22E-03   | 0.498 (0.292, 0.851)  |
| SNP_A-1785028 | 8   | 62315455  | rs3864670  |         | 0.13 | A           | 0.00303  | 0.004    | 7.47E-05 | 7.86E-03   | 0.478 (0.277, 0.824)  |
| SNP_A-2207718 | 8   | 62315603  | rs3864671  |         | 0.13 | C           | 0.00303  | 0.00247  | 4.79E-05 | 4.01E-03   | 0.478 (0.277, 0.824)  |
| SNP_A-2047557 | 6   | 118634581 | rs1413846  | SLC35F1 | 0.39 | A           | 0.00566  | 0.0107   | 3.24E-04 | 7.98E-04   | 1.8 (1.2, 2.7)        |
| SNP_A-2061448 | 6   | 118634711 | rs1413845  | SLC35F1 | 0.39 | C           | 0.00796  | 0.00566  | 2.48E-04 | 6.57E-04   | 1.77 (1.18, 2.65)     |
| SNP_A-2295593 | 4   | 142948222 | rs17015014 | IL15    | 0.19 | C           | 0.00425  | 0.0044   | 1.11E-04 | 1.11E-04   | 2.2 (1.42, 3.41)      |
| SNP_A-1676613 | 4   | 142873151 | rs10519612 | IL15    | 0.13 | C           | 0.0117   | 0.0106   | 6.20E-04 | 1.03E-03   | 2.42 (1.41, 4.15)     |
| SNP_A-4264519 | 4   | 142873534 | rs10519613 | IL15    | 0.13 | A           | 0.00769  | 0.00291  | 1.31E-04 | 8.62E-04   | 2.18 (1.3, 3.68)      |
| SNP_A-2062945 | 4   | 142929173 | rs17007695 | IL15    | 0.10 | C           | 4.43E-04 | 2.34E-04 | 8.85E-07 | 1.31E-04   | 2.67 (1.53, 4.68)     |
| SNP_A-1958136 | 4   | 142899038 | rs35964658 | IL15    | 0.12 | G           | 0.00225  | 0.00274  | 4.01E-05 | 1.27E-03   | 2.38 (1.38, 4.1)      |
| SNP_A-4272012 | 22  | 20139185  | rs463426   | HIC2    | 0.39 | T           | 0.0052   | 0.0109   | 3.05E-04 | 2.71E-03   | 1.73 (1.14, 2.62)     |
| SNP_A-4259020 | 22  | 20136401  | rs460106   | HIC2    | 0.40 | T           | 0.0119   | 0.00935  | 5.62E-04 | 1.97E-03   | 0.585 (0.382, 0.896)  |
| SNP_A-4271870 | 2   | 157986459 | rs16841722 | PSCDBP  | 0.03 | C           | 0.00258  | 0.0101   | 1.51E-04 | 2.37E-03   | 4.16 (1.53, 11.3)     |
| SNP_A-1888709 | 2   | 157986491 | rs3769376  | PSCDBP  | 0.03 | C           | 0.00258  | 0.0101   | 1.51E-04 | 2.37E-03   | 0.24 (0.0883, 0.654)  |
| SNP_A-1787461 | 10  | 120417302 | rs1312895  | C1orf46 | 0.17 | T           | 0.00241  | 0.00949  | 1.34E-04 | 4.09E-03   | 2.04 (1.21, 3.42)     |
| SNP_A-2039544 | 10  | 120418749 | rs1247118  | C1orf46 | 0.16 | A           | 0.00308  | 0.0125   | 2.15E-04 | 4.04E-03   | 2.01 (1.19, 3.37)     |
| SNP_A-2171639 | 5   | 148869211 | rs752822   | CSNK1A1 | 0.27 | T           | 0.0069   | 0.0044   | 1.73E-04 | 3.69E-04   | 1.75 (1.11, 2.76)     |
| SNP_A-2069005 | 16  | 77996875  | rs4888024  |         | 0.44 | G           | 0.00321  | 0.0116   | 2.08E-04 | 6.75E-04   | 1.84 (1.21, 2.79)     |
| SNP_A-4272973 | 11  | 95639748  | rs7115578  | MAML2   | 0.36 | A           | 0.00205  | 5.03E-04 | 7.62E-06 | 2.36E-05   | 0.539 (0.359, 0.811)  |
| SNP_A-1919387 | 22  | 18703211  | rs6518604  |         | 0.02 | G           | 0.00233  | 0.00475  | 6.87E-05 | 1.64E-04   | 0.201 (0.0699, 0.575) |
| SNP_A-1988256 | 6   | 155971493 | rs35229355 |         | 0.03 | T           | 7.24E-05 | 0.00899  | 4.96E-06 | 4.84E-04   | 7.24 (2.46, 21.3)     |

| SNP           | Chr | Location  | RS_ID      | Gene     | MAF  | Risk Allele | P_SJ     | P_COG    | P_Comb   | P_Adjusted | OR                     |
|---------------|-----|-----------|------------|----------|------|-------------|----------|----------|----------|------------|------------------------|
| SNP_A-2139851 | 10  | 122890613 | rs2901286  |          | 0.03 | A           | 4.05E-04 | 0.00123  | 3.86E-06 | 6.28E-06   | 4.66 (1.58, 13.7)      |
| SNP_A-1676306 | 10  | 122898209 | rs10510089 |          | 0.04 | C           | 0.0117   | 0.00114  | 8.15E-05 | 3.99E-04   | 0.362 (0.146, 0.9)     |
| SNP_A-1980357 | 5   | 3587426   |            |          | 0.04 | G           | 0.00549  | 9.51E-04 | 3.44E-05 | 6.69E-06   | 3.18 (1.31, 7.71)      |
| SNP_A-1969697 | 21  | 27030694  | rs2409191  |          | 0.11 | A           | 0.00145  | 0.0106   | 9.29E-05 | 6.36E-04   | 0.502 (0.294, 0.857)   |
| SNP_A-1930568 | 1   | 47515776  | rs11211503 | STIL     | 0.02 | A           | 0.00654  | 0.00889  | 3.13E-04 | 2.51E-03   | 0.219 (0.0678, 0.708)  |
| SNP_A-1754353 | 1   | 207185511 | rs7517671  |          | 0.28 | A           | 0.0112   | 0.00883  | 5.05E-04 | 4.54E-04   | 1.78 (1.16, 2.74)      |
| SNP_A-1683695 | 14  | 36348715  | rs1631933  | SLC25A21 | 0.39 | G           | 0.0123   | 0.00645  | 4.14E-04 | 1.13E-03   | 0.554 (0.356, 0.861)   |
| SNP_A-1990753 | 7   | 103331139 | rs6951651  | RELN     | 0.41 | C           | 0.00661  | 0.00626  | 2.30E-04 | 4.52E-04   | 1.85 (1.19, 2.86)      |
| SNP_A-1937715 | 1   | 238934099 | rs16840493 |          | 0.08 | T           | 0.00341  | 0.00267  | 5.74E-05 | 2.58E-03   | 2.8 (1.4, 5.58)        |
| SNP_A-1667637 | 7   | 19876055  | rs10264784 |          | 0.17 | C           | 0.00699  | 0.0103   | 3.79E-04 | 1.68E-03   | 1.86 (1.19, 2.91)      |
| SNP_A-4285668 | 2   | 75564253  | rs1158392  | TMEM166  | 0.22 | A           | 0.00965  | 0.00795  | 4.02E-04 | 1.99E-03   | 1.78 (1.16, 2.74)      |
| SNP_A-1918014 | 5   | 36173377  | rs267759   | LMBRD2   | 0.05 | A           | 2.88E-04 | 0.00316  | 6.78E-06 | 2.43E-04   | 3.23 (1.52, 6.87)      |
| SNP_A-4234252 | 7   | 15757351  | rs17169056 |          | 0.02 | G           | 0.00396  | 5.19E-04 | 1.45E-05 | 1.82E-03   | 4.28 (1.3, 14)         |
| SNP_A-1958126 | 6   | 94497325  | rs9345389  |          | 0.05 | G           | 0.00201  | 0.0094   | 1.12E-04 | 5.16E-03   | 0.312 (0.137, 0.708)   |
| SNP_A-2152188 | 6   | 53564641  | rs486060   |          | 0.09 | C           | 0.00376  | 0.0118   | 2.45E-04 | 4.58E-03   | 2.59 (1.42, 4.73)      |
| SNP_A-4281758 | 12  | 114362160 | rs11067600 |          | 0.07 | C           | 0.00391  | 0.00225  | 5.56E-05 | 7.66E-03   | 0.352 (0.164, 0.754)   |
| SNP_A-2041620 | 6   | 131511929 | rs6917207  | AKAP7    | 0.16 | T           | 0.0111   | 0.00118  | 8.02E-05 | 3.53E-04   | 0.538 (0.321, 0.902)   |
| SNP_A-2174556 | 1   | 54847650  | rs2289015  | ACOT11   | 0.05 | T           | 2.38E-04 | 0.0105   | 1.74E-05 | 4.65E-06   | 3.67 (1.76, 7.65)      |
| SNP_A-1727090 | 11  | 106935264 | rs10502094 | ALKBH8   | 0.04 | G           | 0.00252  | 0.00515  | 7.95E-05 | 2.60E-04   | 0.319 (0.144, 0.707)   |
| SNP_A-1793591 | 11  | 20519095  | rs7128311  |          | 0.03 | C           | 5.90E-05 | 0.011    | 4.95E-06 | 1.32E-03   | 13.9 (2.72, 71.1)      |
| SNP_A-1718563 | 2   | 17888754  | rs10495669 |          | 0.46 | C           | 0.0063   | 0.00919  | 3.11E-04 | 3.57E-04   | 0.56 (0.371, 0.846)    |
| SNP_A-2184177 | 5   | 27993195  | rs389719   |          | 0.25 | A           | 6.83E-04 | 0.00428  | 2.01E-05 | 5.97E-04   | 1.89 (1.23, 2.89)      |
| SNP_A-1750447 | 9   | 23765449  | rs959091   | ELAVL2   | 0.12 | G           | 0.0124   | 0.011    | 6.75E-04 | 2.35E-03   | 2.12 (1.21, 3.72)      |
| SNP_A-4233826 | 7   | 37232877  | rs4723619  | ELMO1    | 0.07 | C           | 8.70E-04 | 4.45E-04 | 3.05E-06 | 4.59E-05   | 3.01 (1.5, 6.03)       |
| SNP_A-4285077 | 16  | 20227588  | rs4078023  | GP2      | 0.04 | G           | 0.0094   | 0.00546  | 2.79E-04 | 1.50E-02   | 0.436 (0.204, 0.931)   |
| SNP_A-1709114 | 10  | 8190719   | rs10508343 |          | 0.04 | A           | 6.00E-04 | 0.00169  | 7.50E-06 | 1.52E-03   | 3.81 (1.4, 10.4)       |
| SNP_A-4249789 | 20  | 45642012  | rs6125048  | NCOA3    | 0.04 | T           | 0.00867  | 3.37E-05 | 2.34E-06 | 1.55E-03   | 2.73 (1.08, 6.88)      |
| SNP_A-1713408 | 2   | 40842565  | rs1012620  |          | 0.04 | G           | 0.0085   | 0.00831  | 3.73E-04 | 9.09E-04   | 0.227 (0.0751, 0.688)  |
| SNP_A-1892341 | 10  | 17428149  | rs359312   | ST8SIA6  | 0.04 | T           | 0.00103  | 9.57E-06 | 9.58E-08 | 1.53E-06   | 3.91 (1.52, 10.1)      |
| SNP_A-1916779 | 11  | 102137403 | rs17099545 |          | 0.03 | G           | 0.0112   | 0.00942  | 5.36E-04 | 3.20E-03   | 3.9 (1.25, 12.1)       |
| SNP_A-2158344 | 4   | 26665455  | rs6851702  |          | 0.07 | G           | 0.00586  | 0.0107   | 3.35E-04 | 2.07E-03   | 2.17 (1.15, 4.08)      |
| SNP_A-2105458 | 7   | 14412442  | rs6971925  | DGKB     | 0.02 | T           | 5.44E-05 | 0.00777  | 3.31E-06 | 1.88E-04   | 0.0719 (0.0141, 0.367) |
| SNP_A-4277336 | 20  | 45061176  | rs12481102 | EYA2     | 0.03 | T           | 0.00605  | 0.00863  | 2.84E-04 | 1.24E-02   | 0.319 (0.1, 1.01)      |
| SNP_A-2242289 | 20  | 45077823  | rs3827063  | EYA2     | 0.03 | A           | 0.0038   | 0.0117   | 2.45E-04 | 1.08E-02   | 0.248 (0.0858, 0.716)  |

SNP indicates the Affymetrix ID of a single nucleotide polymorphism (SNP) marker; Chr: chromosome; Location: physical location of a SNP based on Mar. 2006 human genome assembly (hg18); RS\_ID: SNP ID according to the dbSNP database; Gene: gene annotation of the SNP (detailed in the supplemental information); MAF: minor allele frequency in the patients included in the genome-wide association analyses; Risk allele: allele that conferred risk of MRD-positive status; P\_SJ: P value for association with MRD in the St. Jude cohort; P\_COG: P value for association with MRD in the COG cohort; P\_comb: P value for association with MRD in the combined analysis; P\_Adjusted: P value for association with MRD after adjusting for race, age, and molecular ALL subtype; OR: odds ratio for MRD-positive status (values in parenthesis indicate the 95% confidence interval). SNPs in strong linkage disequilibrium ( $r^2 > 0.5$ ) are grouped together, and each group is indicated by a distinct color.

**Table 3S. Relation of MRD-associated SNPs to other phenotypes.**

| SNP           | Chr | Location  | RS_ID      | Gene  | MAF  | MTX_CL | MTX_PG | VP_CL  | Relapse_Crr | Relapse_Cin | Super_MRD_SJ | Super_MRD_COG |
|---------------|-----|-----------|------------|-------|------|--------|--------|--------|-------------|-------------|--------------|---------------|
| SNP_A-1709241 | 7   | 8970101   | rs10486275 |       | 0.32 | 0.2015 | 0.4868 | 0.9939 | >0.5        | >0.5        | 0.127        | 0.00213       |
| SNP_A-4291612 | 14  | 48095268  | rs4522336  |       | 0.16 | 0.1672 | 0.2845 | 0.0271 | >0.5        | >0.5        | 0.191        | 0.12          |
| SNP_A-2155892 | 13  | 100595841 | rs7992226  | NALCN | 0.25 | 0.0107 | 0.5688 | 0.9710 | 0.0645      | 0.0288      | 0.0234       | 0.0000416     |
| SNP_A-2292283 | 2   | 100961907 | rs1542178  | NPAS2 | 0.28 | 0.8772 | 0.2724 | 0.3157 | >0.5        | >0.5        | 0.0316       | 0.111         |
| SNP_A-2239298 | 8   | 18673653  | rs11203995 | PSD3  | 0.49 | 0.2299 | 0.2207 | 0.4312 | 0.1111      | 0.0259      | 0.000736     | 0.011         |
| SNP_A-4236270 | 3   | 170154427 | rs9871556  |       | 0.45 | 0.0969 | 0.0322 | 0.8351 | >0.5        | >0.5        | 0.0144       | 0.0435        |
| SNP_A-2191667 | 1   | 215239015 | rs1339219  | ESRRG | 0.45 | 0.3197 | 0.7334 | 0.8202 | >0.5        | >0.5        | 0.0749       | 0.00873       |
| SNP_A-1740495 | 3   | 7887606   | rs7652838  |       | 0.12 | 0.1112 | 0.6120 | 0.2652 | 0.0371      | 0.3444      | 0.148        | 0.00338       |
| SNP_A-1673416 | 6   | 55918441  | rs4312989  |       | 0.34 | 0.6307 | 0.8674 | 0.7702 | >0.5        | >0.5        | 0.0164       | 0.0162        |
| SNP_A-2297092 | 1   | 43493581  | rs3862227  |       | 0.32 | 0.0326 | 0.0340 | 0.4461 | >0.5        | >0.5        | 0.00337      | 0.0993        |
| SNP_A-2240822 | 19  | 39306923  | rs11673011 |       | 0.31 | 0.4930 | 0.1939 | 0.2842 | >0.5        | >0.5        | 0.257        | 0.171         |
| SNP_A-2277218 | 19  | 39303589  | rs11666638 |       | 0.31 | 0.5229 | 0.4068 | 0.2850 | >0.5        | >0.5        | 0.383        | 0.187         |
| SNP_A-4264692 | 5   | 3469372   | rs17683231 |       | 0.07 | 0.5087 | 0.6992 | 0.2916 | 0.0699      | 0.0930      | 0.00682      | 0.0122        |
| SNP_A-1980351 | 5   | 3448915   | rs17682547 |       | 0.05 | 0.5999 | 0.9808 | 0.8392 | >0.5        | >0.5        | 0.00213      | 0.0923        |
| SNP_A-2216221 | 5   | 3470577   | rs17632091 |       | 0.05 | 0.6199 | 0.6855 | 0.6474 | >0.5        | >0.5        | 0.00223      | 0.0282        |
| SNP_A-2172039 | 4   | 33719815  | rs13106616 |       | 0.15 | 0.6923 | 0.2720 | 0.0031 | 0.0810      | 0.0170      | 0.0486       | 0.0127        |
| SNP_A-1976736 | 4   | 33700472  | rs12644671 |       | 0.16 | 0.4930 | 0.3352 | 0.0013 | >0.5        | >0.5        | 0.0244       | 0.0587        |
| SNP_A-2009694 | 4   | 33405626  | rs6844110  |       | 0.16 | 0.5156 | 0.7019 | 0.0080 | >0.5        | >0.5        | 0.00606      | 0.0783        |
| SNP_A-1930229 | 4   | 33424921  | rs1373494  |       | 0.15 | 0.6200 | 0.4105 | 0.0214 | >0.5        | >0.5        | 0.0123       | 0.128         |
| SNP_A-1907313 | 4   | 33406171  | rs7691996  |       | 0.15 | 0.6615 | 0.5074 | 0.0214 | >0.5        | >0.5        | 0.0163       | 0.0783        |
| SNP_A-2009695 | 4   | 33406328  | rs7664751  |       | 0.15 | 0.6980 | 0.5561 | 0.0214 | >0.5        | >0.5        | 0.0138       | 0.0783        |
| SNP_A-4194613 | 10  | 126638997 | rs17152408 | CTBP2 | 0.16 | 0.9001 | 0.4255 | 0.3874 | >0.5        | >0.5        | 0.0736       | 0.000344      |
| SNP_A-1913543 | 10  | 126639506 | rs17152411 | CTBP2 | 0.15 | 0.9434 | 0.3253 | 0.4292 | >0.5        | >0.5        | 0.121        | 0.000458      |
| SNP_A-2265775 | 10  | 126574989 | rs7900929  | CTBP2 | 0.15 | 0.9701 | 0.6613 | 0.3353 | >0.5        | >0.5        | 0.119        | 0.000311      |
| SNP_A-2218245 | 10  | 126577363 | rs7086128  | CTBP2 | 0.15 | 0.9576 | 0.6113 | 0.3010 | >0.5        | >0.5        | 0.104        | 0.000311      |
| SNP_A-1682324 | 17  | 28297991  | rs2521984  |       | 0.29 | 0.1653 | 0.9453 | 0.2028 | >0.5        | >0.5        | 0.137        | 0.0027        |
| SNP_A-4218391 | 1   | 176044231 | rs4650977  |       | 0.36 | 0.1272 | 0.3960 | 0.9254 | >0.5        | >0.5        | 0.0163       | 0.031         |
| SNP_A-1829813 | 1   | 67037519  | rs497710   | INSL5 | 0.15 | 0.2148 | 0.3959 | 0.8976 | >0.5        | >0.5        | 0.349        | 0.368         |
| SNP_A-4244750 | 11  | 115818726 | rs11215936 |       | 0.06 | 0.7779 | 0.8878 | 0.7372 | >0.5        | >0.5        | 0.0177       | 0.0582        |
| SNP_A-1853385 | 5   | 120633604 | rs17147528 |       | 0.05 | 0.3643 | -      | 0.8412 | >0.5        | >0.5        | 0.0388       | 0.0495        |
| SNP_A-4199696 | 14  | 99145812  | rs4905865  |       | 0.29 | 0.0052 | 0.2860 | 0.8084 | >0.5        | >0.5        | 0.0704       | 0.0466        |
| SNP_A-2241347 | 14  | 99145526  | rs11160533 |       | 0.29 | 0.0055 | 0.2972 | 0.7598 | >0.5        | >0.5        | 0.0704       | 0.0384        |
| SNP_A-1786996 | 10  | 108035647 | rs1359645  |       | 0.08 | 0.0496 | 0.1184 | 0.4356 | 0.0937      | 0.0472      | 0.007        | 0.00666       |



| SNP           | Chr | Location  | RS_ID      | Gene    | MAF  | MTX_CL | MTX_PG | VP_CL  | Relapse_Crr | Relapse_Cin | Super_MRD_SJ | Super_MRD_COG |
|---------------|-----|-----------|------------|---------|------|--------|--------|--------|-------------|-------------|--------------|---------------|
| SNP_A-2261153 | 9   | 8751778   | rs10116682 | PTPRD   | 0.04 | 0.4367 | 0.0233 | 0.2568 | >0.5        | >0.5        | 0.00165      | 0.0121        |
| SNP_A-1796782 | 9   | 8739291   | rs6477346  | PTPRD   | 0.04 | 0.9091 | 0.0633 | 0.8535 | >0.5        | >0.5        | 0.00166      | 0.0343        |
| SNP_A-1675970 | 8   | 18691618  | rs335251   | PSD3    | 0.40 | 0.0678 | 0.7568 | 0.5179 | >0.5        | >0.5        | 0.00778      | 0.00129       |
| SNP_A-1812242 | 2   | 173455958 | rs2676527  | RAPGEF4 | 0.03 | 0.9034 | -      | 0.7783 | >0.5        | >0.5        | 0.123        | 0.0313        |
| SNP_A-1849963 | 22  | 47310862  | rs16999349 | FAM19A5 | 0.14 | 0.9215 | 0.8270 | 0.9678 | >0.5        | >0.5        | 0.0211       | 0.00382       |
| SNP_A-2146428 | 14  | 47157164  | rs8004608  |         | 0.02 | 0.5118 | 0.0176 | 0.1855 | >0.5        | >0.5        | 0.000613     | 0.0308        |
| SNP_A-2084593 | X   | 27766314  | rs16988013 |         | 0.01 | 0.3033 | -      | 0.3909 | >0.5        | >0.5        | NA           | NA            |
| SNP_A-1663705 | 4   | 41406619  | rs6823379  |         | 0.11 | 0.3114 | 0.0844 | 0.9853 | >0.5        | >0.5        | 0.00318      | 0.0162        |
| SNP_A-1953524 | 2   | 200752142 | rs1881539  | C2orf47 | 0.08 | 0.8912 | 0.6110 | 0.3591 | 0.0890      | 0.0061      | 0.0317       | 0.0324        |
| SNP_A-1966464 | 2   | 200606142 | rs10497845 | C2orf47 | 0.08 | 0.2825 | 0.4286 | 0.5898 | >0.5        | >0.5        | 0.0449       | 0.0152        |
| SNP_A-1807959 | 2   | 200440235 | rs769951   | C2orf47 | 0.09 | 0.6740 | 0.0831 | 0.5437 | 0.0101      | 0.0004      | 0.0194       | 0.00248       |
| SNP_A-1794325 | 2   | 200703932 | rs4673727  | C2orf47 | 0.10 | 0.6626 | 0.8518 | 0.4509 | 0.0264      | 0.0011      | 0.0058       | 0.000777      |
| SNP_A-2264953 | 2   | 200730199 | rs1569175  | C2orf47 | 0.11 | 0.5494 | 0.6819 | 0.7942 | 0.0455      | 0.0013      | 0.0105       | 0.000253      |
| SNP_A-1717194 | 8   | 62310549  | rs1486649  |         | 0.13 | 0.1142 | 0.3372 | 0.5838 | 0.0003      | 0.0001      | 0.0637       | 0.011         |
| SNP_A-2044445 | 8   | 62315228  | rs10435604 |         | 0.13 | 0.2061 | 0.2490 | 0.7501 | 0.0009      | 0.0001      | 0.0841       | 0.00662       |
| SNP_A-1785028 | 8   | 62315455  | rs3864670  |         | 0.13 | 0.1846 | 0.2213 | 0.7464 | 0.0028      | 0.0003      | 0.0858       | 0.0124        |
| SNP_A-2207718 | 8   | 62315603  | rs3864671  |         | 0.13 | 0.1846 | 0.2213 | 0.7464 | 0.0032      | 0.0003      | 0.0858       | 0.00792       |
| SNP_A-2047557 | 6   | 118634581 | rs1413846  | SLC35F1 | 0.39 | 0.4978 | 0.2951 | 0.6173 | 0.1107      | 0.0353      | 0.153        | 0.373         |
| SNP_A-2061448 | 6   | 118634711 | rs1413845  | SLC35F1 | 0.39 | 0.5280 | 0.3949 | 0.6173 | 0.0582      | 0.0203      | 0.14         | 0.284         |
| SNP_A-2295593 | 4   | 142948222 | rs17015014 | IL15    | 0.19 | 0.6149 | 0.6441 | 0.0532 | 0.0504      | 0.0059      | 0.0765       | 0.0299        |
| SNP_A-1676613 | 4   | 142873151 | rs10519612 | IL15    | 0.13 | 0.3771 | 0.2475 | 0.7285 | >0.5        | >0.5        | 0.181        | 0.141         |
| SNP_A-4264519 | 4   | 142873534 | rs10519613 | IL15    | 0.13 | 0.1104 | 0.3842 | 0.4157 | >0.5        | >0.5        | 0.0918       | 0.0437        |
| SNP_A-2062945 | 4   | 142929173 | rs17007695 | IL15    | 0.10 | 0.6519 | 0.3365 | 0.0218 | >0.5        | >0.5        | 0.00286      | 0.00277       |
| SNP_A-1958136 | 4   | 142899038 | rs35964658 | IL15    | 0.12 | 0.8522 | 0.1878 | 0.0878 | >0.5        | >0.5        | 0.00968      | 0.0281        |
| SNP_A-4272012 | 22  | 20139185  | rs463426   | HIC2    | 0.39 | 0.2998 | 0.7333 | 0.7689 | >0.5        | >0.5        | 0.124        | 0.0558        |
| SNP_A-4259020 | 22  | 20136401  | rs460106   | HIC2    | 0.40 | 0.2446 | 0.9825 | 0.5574 | >0.5        | >0.5        | 0.244        | 0.0568        |
| SNP_A-4271870 | 2   | 157986459 | rs16841722 | PSCDBP  | 0.03 | 0.2509 | 0.4009 | 0.7206 | 0.0031      | 0.0027      | 0.00785      | 0.0688        |
| SNP_A-1888709 | 2   | 157986491 | rs3769376  | PSCDBP  | 0.03 | 0.2509 | 0.4009 | 0.7206 | 0.0031      | 0.0027      | 0.00785      | 0.0688        |
| SNP_A-1787461 | 10  | 120417302 | rs1312895  | C1orf46 | 0.17 | 0.3179 | 0.5381 | 0.1805 | >0.5        | >0.5        | 0.231        | 0.0106        |
| SNP_A-2039544 | 10  | 120418749 | rs1247118  | C1orf46 | 0.16 | 0.2761 | 0.4942 | 0.2381 | >0.5        | >0.5        | 0.286        | 0.00705       |
| SNP_A-2171639 | 5   | 148869211 | rs752822   | CSNK1A1 | 0.27 | 0.1743 | 0.6729 | 0.6661 | >0.5        | >0.5        | 0.0368       | 0.0108        |
| SNP_A-2069005 | 16  | 77996875  | rs4888024  |         | 0.44 | 0.0312 | 0.2022 | 0.0496 | >0.5        | >0.5        | 0.206        | 0.0661        |
| SNP_A-4272973 | 11  | 95639748  | rs7115578  | MAML2   | 0.36 | 0.4961 | 0.7099 | 0.7714 | 0.0920      | 0.0445      | 0.608        | 0.00232       |
| SNP_A-1919387 | 22  | 18703211  | rs6518604  |         | 0.02 | 0.4620 | 0.7465 | 0.1677 | >0.5        | >0.5        | 0.115        | 0.014         |
| SNP_A-1988256 | 6   | 155971493 | rs35229355 |         | 0.03 | 0.1893 | 0.2276 | 0.4553 | >0.5        | >0.5        | 0.00113      | 0.0314        |

| SNP           | Chr | Location  | RS_ID      | Gene     | MAF  | MTX_CL | MTX_PG | VP_CL  | Relapse_Crr | Relapse_Cin | Super_MRD_SJ | Super_MRD_COG |
|---------------|-----|-----------|------------|----------|------|--------|--------|--------|-------------|-------------|--------------|---------------|
| SNP_A-2139851 | 10  | 122890613 | rs2901286  |          | 0.03 | 0.8291 | -      | 0.9788 | >0.5        | >0.5        | 0.00878      | 0.0146        |
| SNP_A-1676306 | 10  | 122898209 | rs10510089 |          | 0.04 | 0.2788 | -      | 0.5226 | >0.5        | >0.5        | 0.0779       | 0.0124        |
| SNP_A-1980357 | 5   | 3587426   |            |          | 0.04 | 0.8215 | 0.4855 | 0.3041 | >0.5        | >0.5        | 0.266        | 0.00745       |
| SNP_A-1969697 | 21  | 27030694  | rs2409191  |          | 0.11 | 0.6411 | 0.0318 | 0.1473 | 0.0092      | 0.0037      | 0.0119       | 0.135         |
| SNP_A-1930568 | 1   | 47515776  | rs11211503 | STIL     | 0.02 | 0.7855 | 0.7056 | 0.8514 | >0.5        | >0.5        | 0.00817      | 0.00745       |
| SNP_A-1754353 | 1   | 207185511 | rs7517671  |          | 0.28 | 0.1225 | 0.2016 | 0.2314 | >0.5        | >0.5        | 0.239        | 0.0122        |
| SNP_A-1683695 | 14  | 36348715  | rs1631933  | SLC25A21 | 0.39 | 0.1950 | 0.8370 | 0.8865 | 0.0717      | 0.0847      | 0.245        | 0.00847       |
| SNP_A-1990753 | 7   | 103331139 | rs6951651  | RELN     | 0.41 | 0.6271 | 0.3331 | 0.5181 | 0.0939      | 0.0613      | 0.0253       | 0.00446       |
| SNP_A-1937715 | 1   | 238934099 | rs16840493 |          | 0.08 | 0.7309 | 0.4053 | 0.4634 | 0.0088      | 0.0016      | 0.112        | 0.00784       |
| SNP_A-1667637 | 7   | 19876055  | rs10264784 |          | 0.17 | 0.6729 | 0.0772 | 0.0912 | >0.5        | >0.5        | 0.116        | 0.0818        |
| SNP_A-4285668 | 2   | 75564253  | rs1158392  | TMEM166  | 0.22 | 0.3522 | 0.6224 | 0.6976 | 0.0008      | 0.0184      | 0.0617       | 0.0528        |
| SNP_A-1918014 | 5   | 36173377  | rs267759   | LMBRD2   | 0.05 | 0.5282 | 0.6447 | 0.3447 | >0.5        | >0.5        | 0.000835     | 0.0324        |
| SNP_A-4234252 | 7   | 15757351  | rs17169056 |          | 0.02 | 0.9997 | 0.5130 | 0.9304 | >0.5        | >0.5        | 0.0217       | 0.00897       |
| SNP_A-1958126 | 6   | 94497325  | rs9345389  |          | 0.05 | 0.0163 | -      | 0.6142 | >0.5        | >0.5        | 0.0262       | 0.0316        |
| SNP_A-2152188 | 6   | 53564641  | rs486060   |          | 0.09 | 0.8782 | 0.7213 | 0.8557 | 0.1086      | 0.3241      | 0.124        | 0.0103        |
| SNP_A-4281758 | 12  | 114362160 | rs11067600 |          | 0.07 | 0.2257 | 0.6783 | 0.7131 | 0.0007      | 0.0090      | 0.0406       | 0.00575       |
| SNP_A-2041620 | 6   | 131511929 | rs6917207  | AKAP7    | 0.16 | 0.8531 | 0.3997 | 0.9289 | >0.5        | >0.5        | 0.583        | 0.00204       |
| SNP_A-2174556 | 1   | 54847650  | rs2289015  | ACOT11   | 0.05 | 0.2886 | 0.5094 | 0.1276 | >0.5        | >0.5        | 0.0773       | 0.0207        |
| SNP_A-1727090 | 11  | 106935264 | rs10502094 | ALKBH8   | 0.04 | 0.6271 | 0.0268 | 0.8139 | 0.0070      | 0.0852      | 0.0112       | 0.0103        |
| SNP_A-1793591 | 11  | 20519095  | rs7128311  |          | 0.03 | 0.8920 | 0.5406 | -      | 0.0099      | 0.0000      | 0.00574      | 0.0126        |
| SNP_A-1718563 | 2   | 17888754  | rs10495669 |          | 0.46 | 0.4493 | 0.1548 | 0.1760 | >0.5        | >0.5        | 0.0274       | 0.0363        |
| SNP_A-2184177 | 5   | 27993195  | rs389719   |          | 0.25 | 0.4633 | 0.3583 | 0.0939 | >0.5        | >0.5        | 0.0221       | 0.00804       |
| SNP_A-1750447 | 9   | 23765449  | rs959091   | ELAVL2   | 0.12 | 0.7085 | 0.4046 | 0.9663 | >0.5        | >0.5        | 0.0055       | 0.189         |
| SNP_A-4233826 | 7   | 37232877  | rs4723619  | ELMO1    | 0.07 | 0.0487 | 0.2028 | 0.0226 | 0.0057      | 0.0005      | 0.0124       | 0.00194       |
| SNP_A-4285077 | 16  | 20227588  | rs4078023  | GP2      | 0.04 | 0.8111 | 0.3679 | 0.9158 | 0.0000      | 0.0000      | 0.0118       | 0.0129        |
| SNP_A-1709114 | 10  | 8190719   | rs10508343 |          | 0.04 | 0.3221 | 0.8737 | 0.5704 | >0.5        | >0.5        | 0.0648       | 0.00691       |
| SNP_A-4249789 | 20  | 45642012  | rs6125048  | NCOA3    | 0.04 | 0.5625 | 0.5749 | 0.6604 | 0.0007      | 0.0017      | 0.427        | 0.0000858     |
| SNP_A-1713408 | 2   | 40842565  | rs1012620  |          | 0.04 | 0.2495 | 0.8475 | 0.0571 | >0.5        | >0.5        | 0.149        | 0.0247        |
| SNP_A-1892341 | 10  | 17428149  | rs359312   | ST8SIA6  | 0.04 | 0.9217 | 0.5195 | 1.0000 | 0.0332      | 0.0008      | 0.00797      | 0.000297      |
| SNP_A-1916779 | 11  | 102137403 | rs17099545 |          | 0.03 | 0.3694 | 0.7429 | 0.2464 | 0.0077      | 0.0000      | 0.338        | 0.0184        |
| SNP_A-2158344 | 4   | 26665455  | rs6851702  |          | 0.07 | 0.0662 | 0.5900 | 0.9250 | >0.5        | >0.5        | 0.0364       | 0.0458        |
| SNP_A-2105458 | 7   | 14412442  | rs6971925  | DGKB     | 0.02 | 0.5431 | 0.1463 | 1.0000 | 0.0731      | 0.0081      | 0.0305       | 0.2           |
| SNP_A-4277336 | 20  | 45061176  | rs12481102 | EYA2     | 0.03 | 0.6149 | 0.3965 | 0.1146 | 0.0051      | 0.0027      | 0.684        | 0.00753       |
| SNP_A-2242289 | 20  | 45077823  | rs3827063  | EYA2     | 0.03 | 0.7119 | 0.3472 | 0.1704 | 0.0007      | 0.0004      | 0.436        | 0.00637       |

SNP, Chr, Location, RS\_ID, Gene, and MAF are defined the same as described in legend of Table 2S. MTX\_CL: P values for association with methotrexate clearance; MTX\_PG: P values for association with methotrexate polyglutamates in leukemic blasts; VP\_CL: P values for association with etoposide clearance; Relapse\_Crr: P values for association with hematologic relapse (regression test); Relapse\_Cin: P values for association with hematologic relapse (Gray's test); Super\_MRD\_SJ: P values for association with early response in St. Jude; Super\_MRD\_COG: P values for association with early response in COG. SNPs in strong linkage disequilibrium ( $r^2 > 0.5$ ) are grouped together, and each group is indicated by a distinct color.

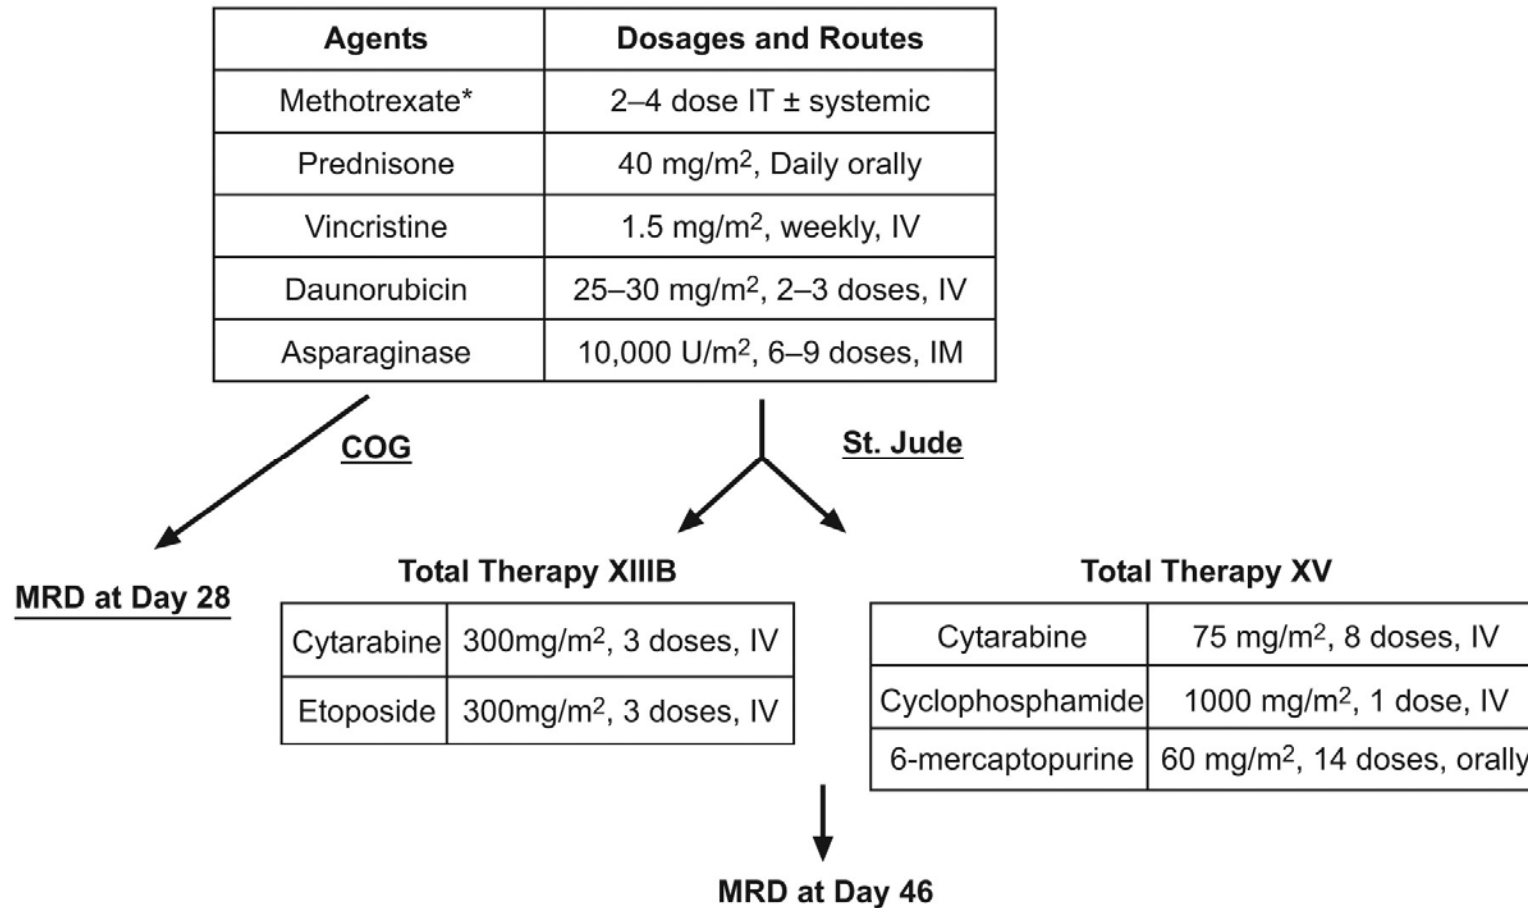

**Figure 1S Remission induction regimens for St. Jude Total Therapy XIII B, XV and COG 9906 protocols.** IT: intrathecal; IV: intravenous; IM: intramuscular. \*Methotrexate was given intrathecally, with or without cytarabine and hydrocortisone, as prophylaxis for central nerve system disease in both St. Jude and COG. However, some St. Jude patients also received the drug orally or intravenously for a single day, in addition to the IT methotrexate. Further details of the treatment regimens can be found in references 21, 22 and at <http://www.acor.org/ped-onc/diseases/ALLtrials/9906.html>.

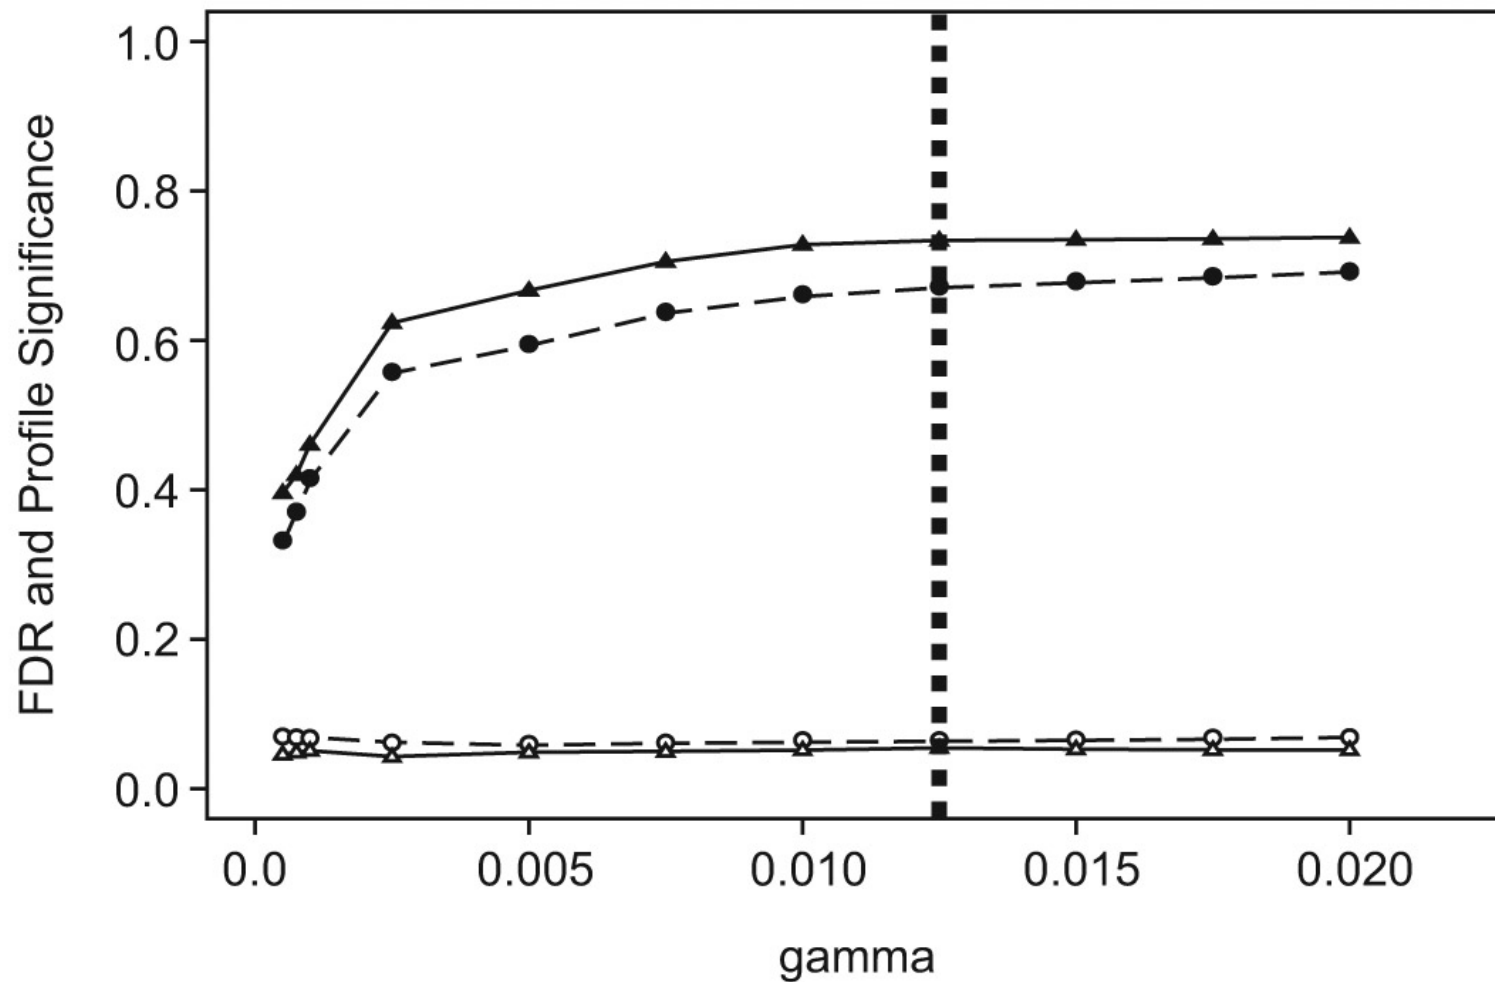

**Figure 2S. False discovery rate (FDR) and profile significance in the St. Jude (n=318) and COG (n=169) MRD cohorts.** Dotted lines with solid and open circles indicate FDR and profile significance, respectively, in the St. Jude cohort at pre-determined per-test significance levels (P value cutoffs/gamma) for SNP genotypes as predictors of MRD. Solid lines with solid and open triangles indicate FDR and profile significance, respectively, in the COG cohort. Dashed vertical line indicates  $P=0.0125$ .

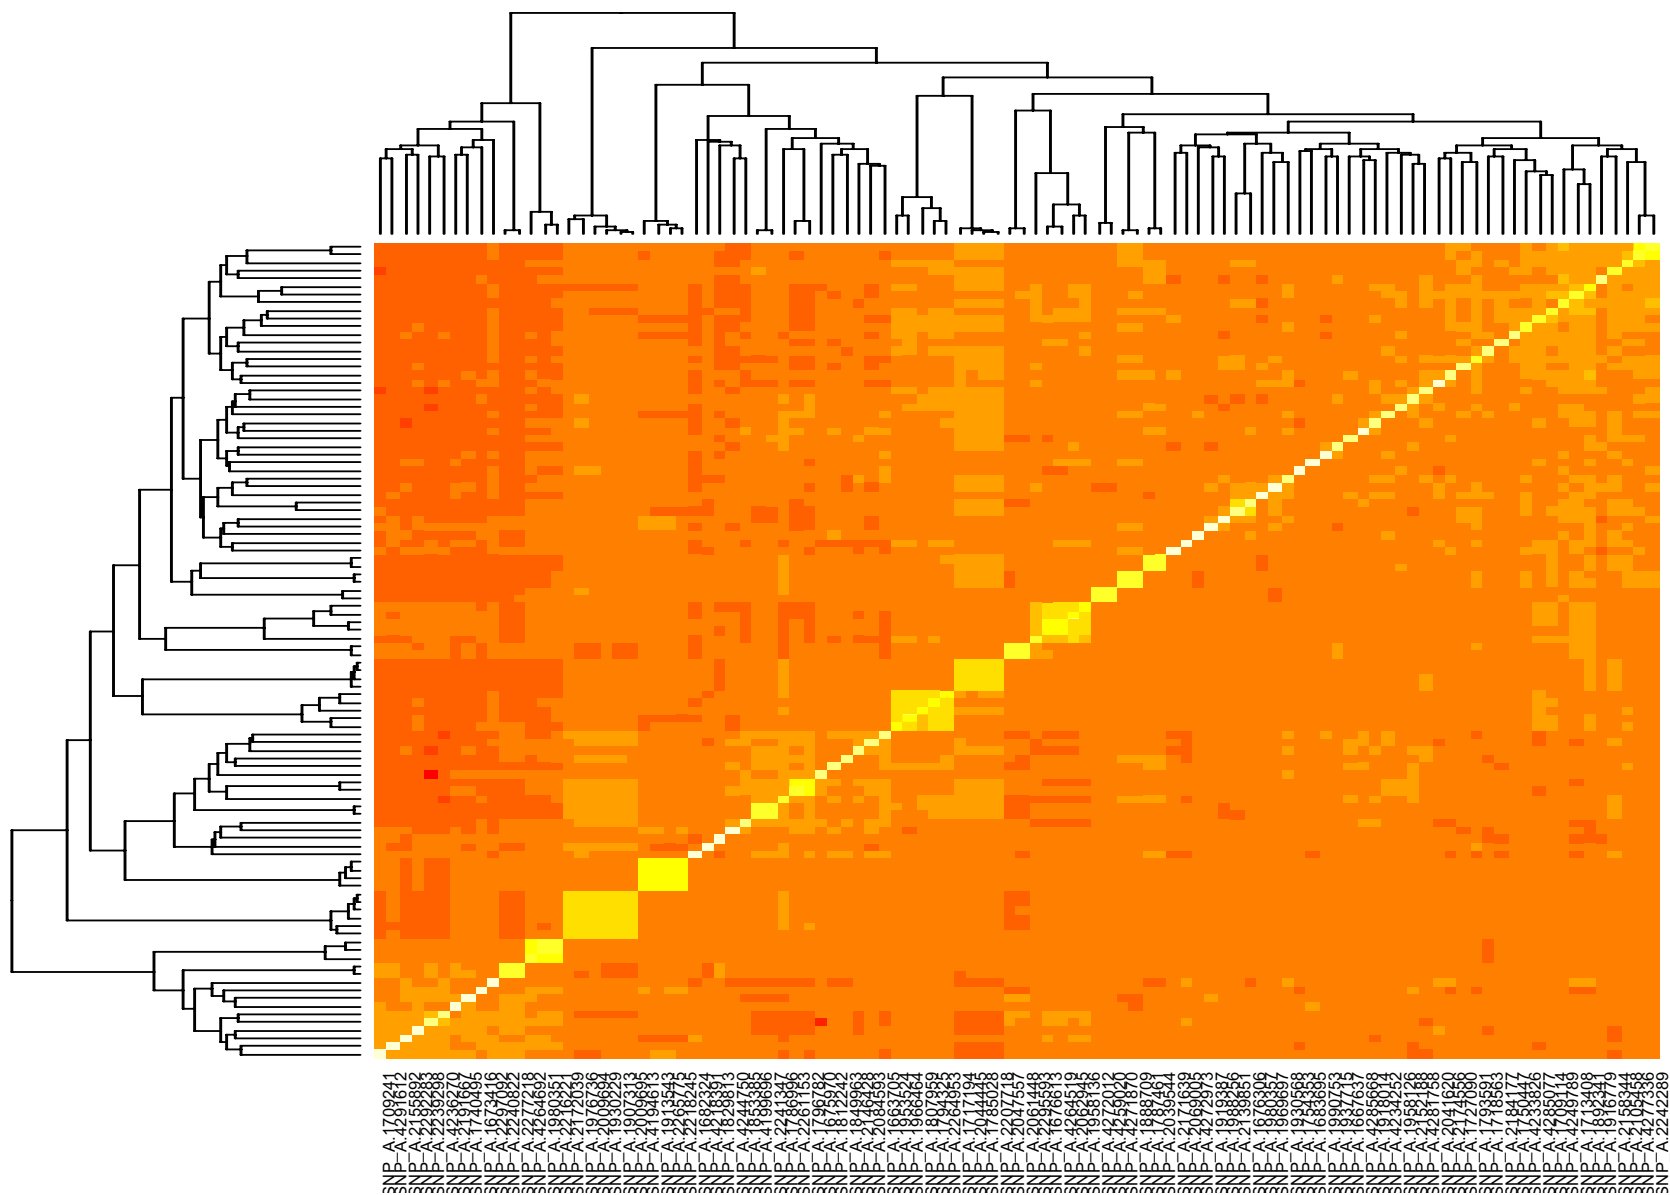

**Figure 3S. Linkage disequilibrium (LD) among the 102 overlapping SNPs predicting MRD in St. Jude and COG MRD cohorts.** SNPs are listed in the same order from left to right horizontally and from the bottom to the top vertically. Degree of correlation is indicated by color: yellow represents high correlation (strong LD) and red represents low correlation (weak LD).

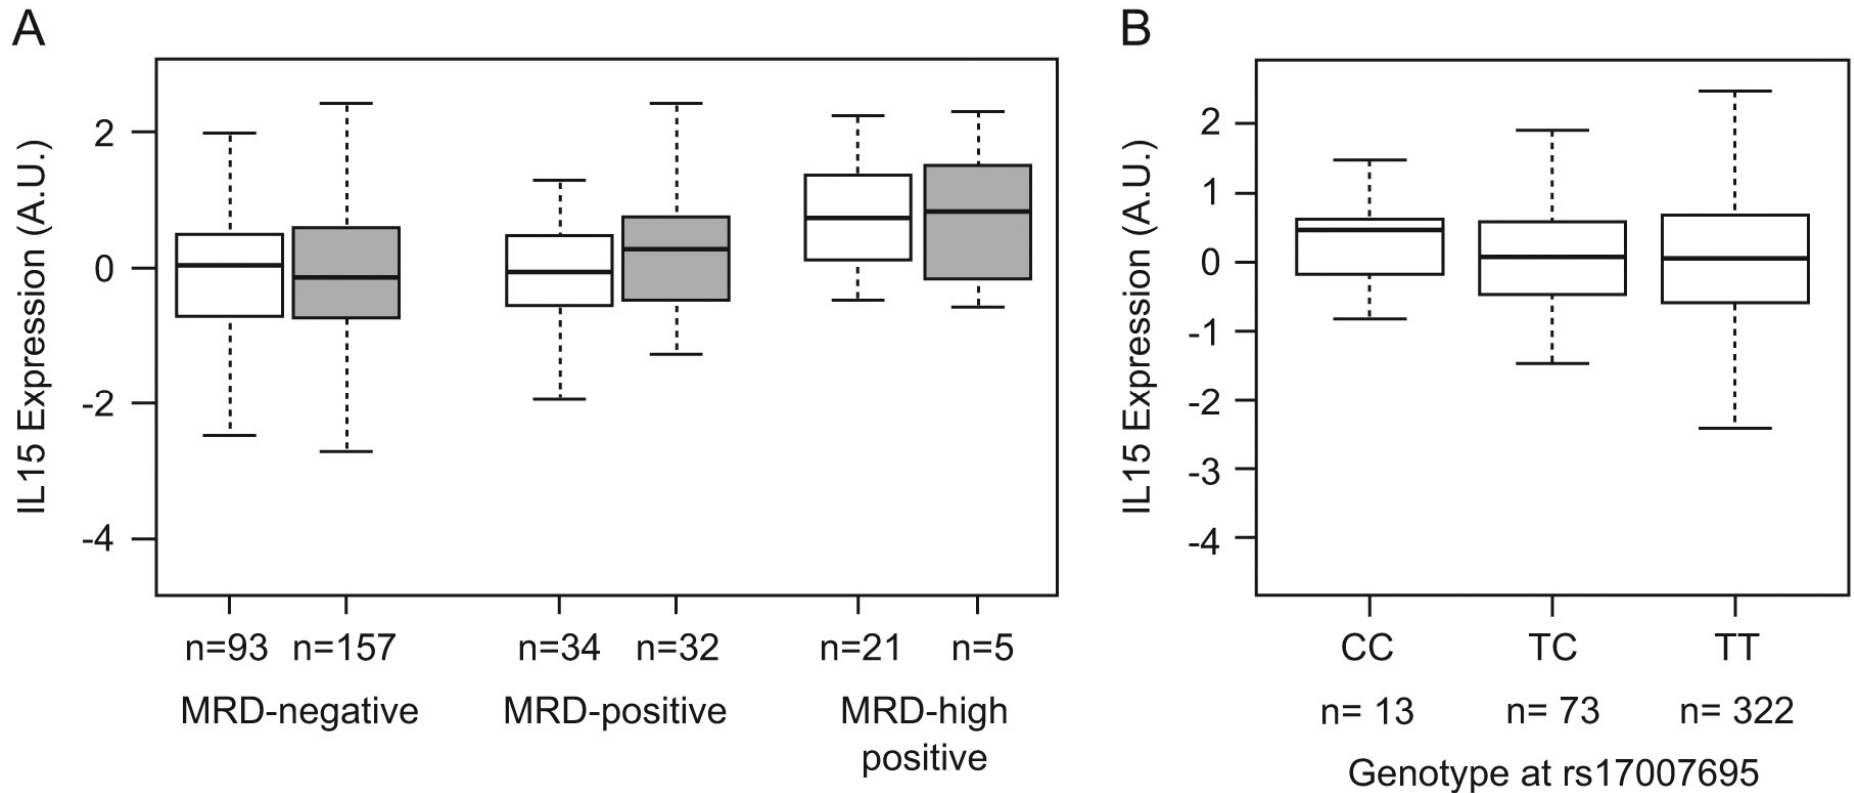

**Figure 4S. Association of tumor IL15 gene expression with MRD and IL15 SNP genotype.** **A**, Relation of IL15 gene expression in diagnostic leukemic blasts to MRD in St. Jude (gray boxes,  $P=0.0342$ ) and COG (open boxes,  $P=0.0035$ ). Patients were classified into MRD-negative, positive, and high-positive, as defined in Materials and Methods. **B**, IL15 gene expression in diagnostic blasts was higher in patients with the CC genotype at IL15 SNP rs17007695 ( $P=0.0701$ ). IL15 expression values were normalized within the St. Jude and COG cohorts. Boxes include data between the 25th and the 75th percentiles, and whiskers represent the maximal and minimal values after excluding outliers.

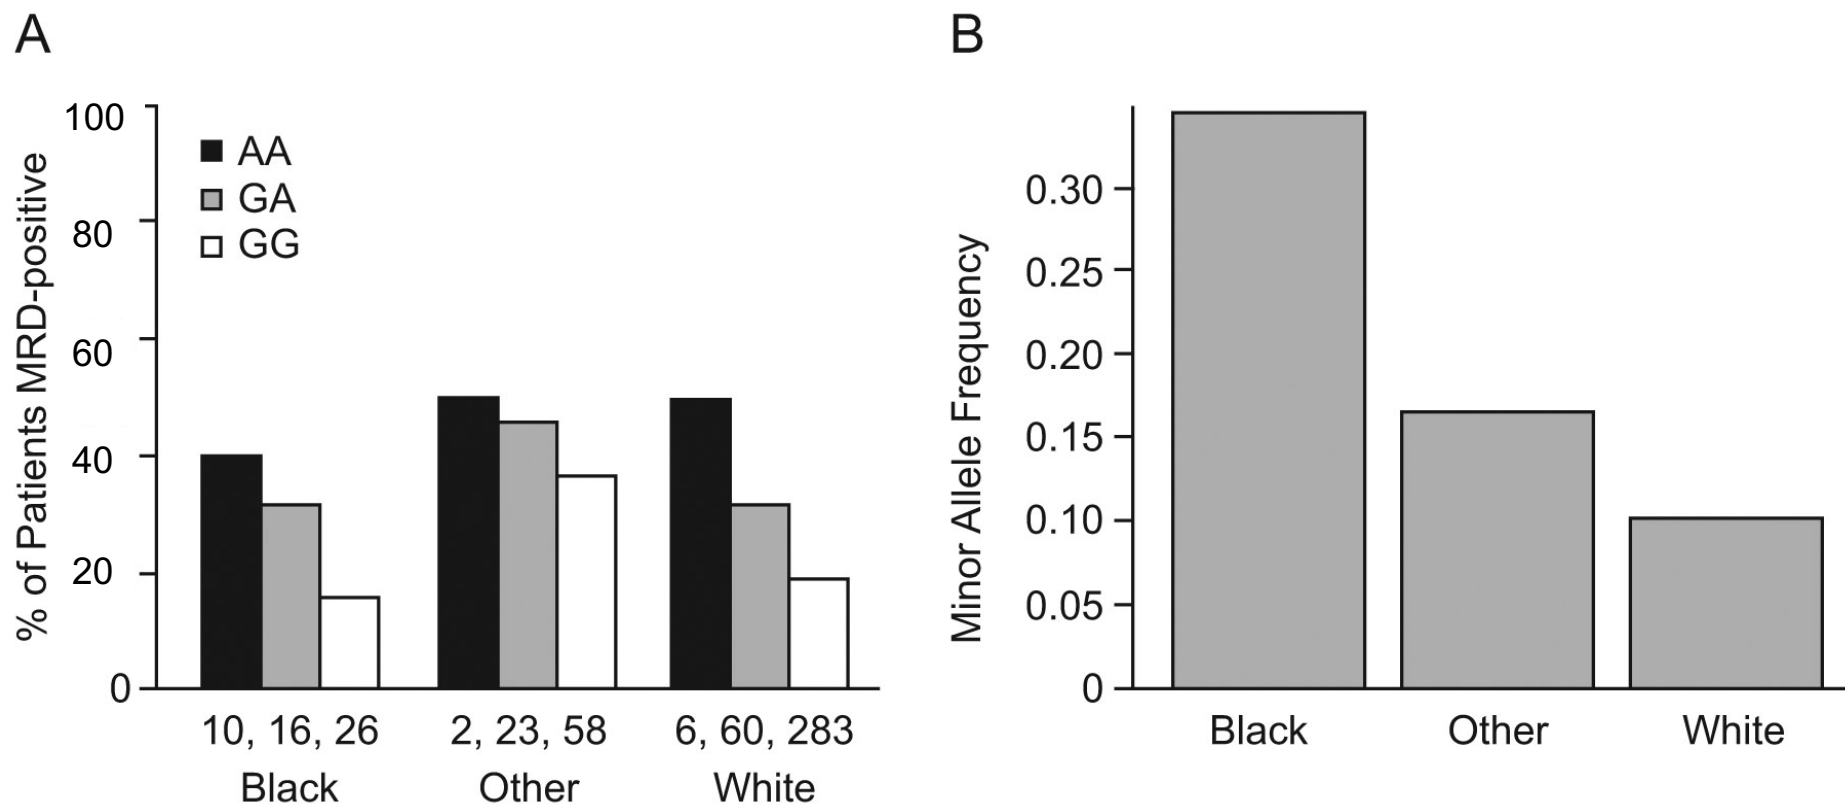

**Figure 5S. MRD-positivity by genotype at rs13106616 in different racial groups. A,** Comparison of association of rs13106616 genotype with MRD by race. Numbers below the X axis indicate the number of patients in that category. **B,** Minor allele frequency of rs13106616 by race. Black: African American; White: Caucasian American; Other: all other patients.
